# Supplementary material
Source: ML conference proceedings conference paper supplement (https://aclanthology.org/2026.semeval-1.300)

### Step 1 - Data augmentation

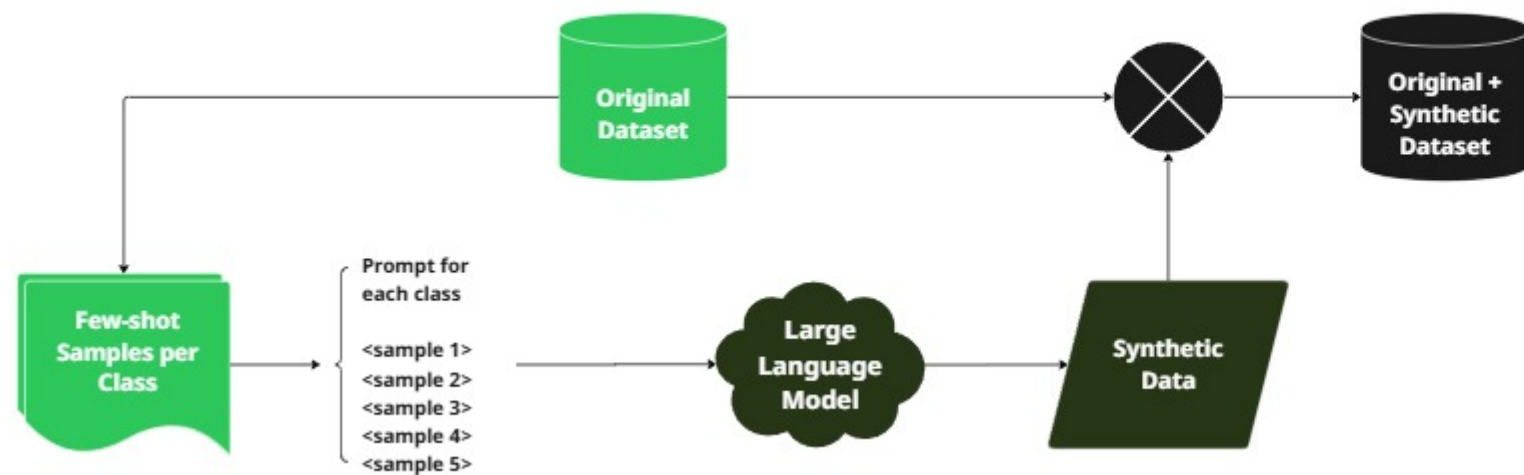

### Step 3 - Results Analysis

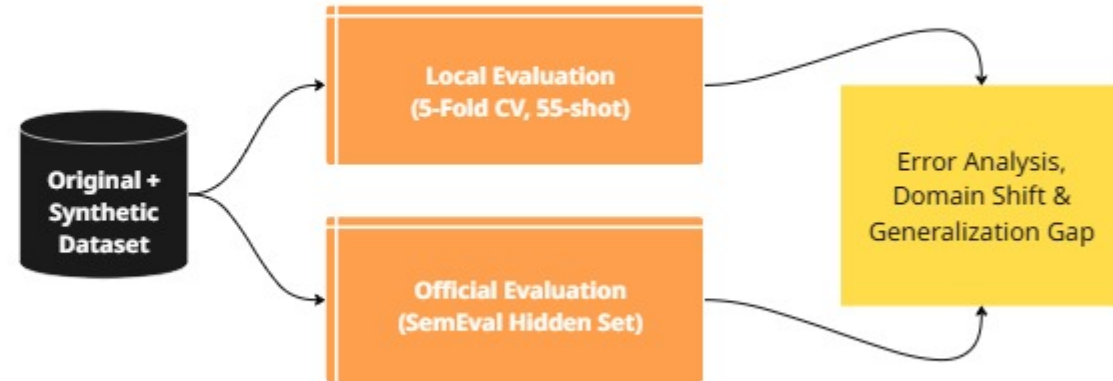

### Step 2 - LAQDA

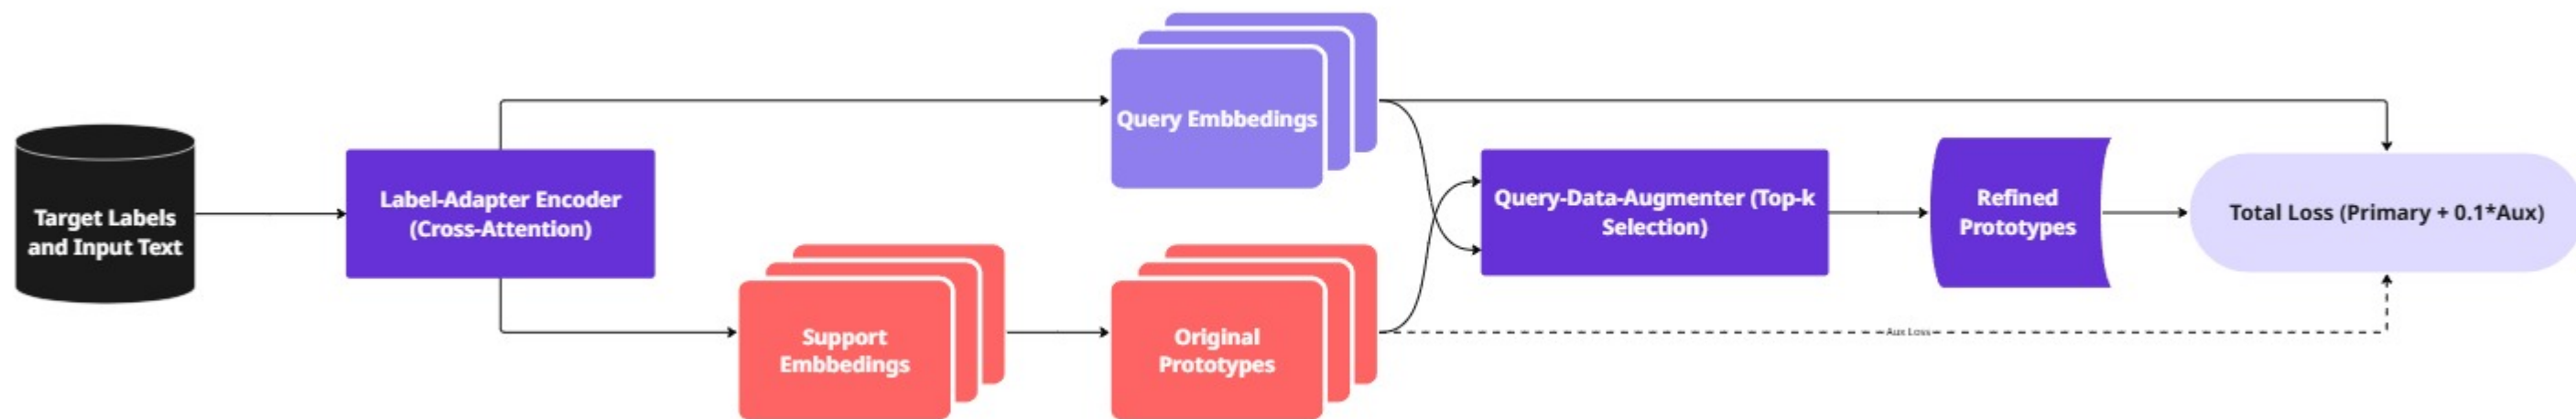

Supplement: SupplementaryMaterial [file SemEval2026fluxograma.pdf › SemEval2026fluxograma.pdf]
